# Supplementary material
Source: PubMed Central journal article supplement (PMC4715627)

## Encoding

APOE $\epsilon$ 4 Non-carriers

APOE $\epsilon$ 4 Carriers

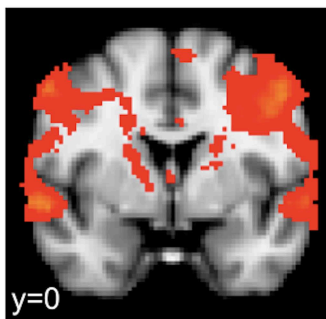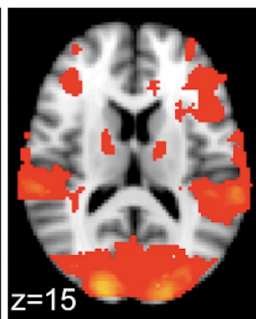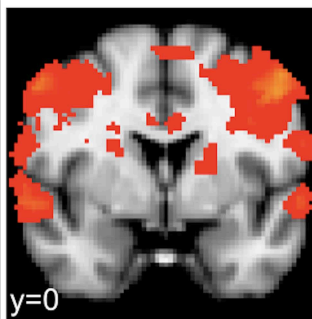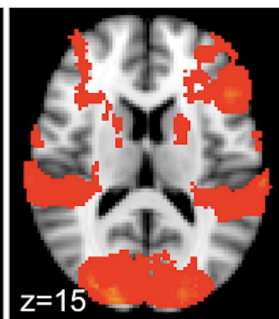

## Retrieval

APOE $\epsilon$ 4 Non-carriers

APOE $\epsilon$ 4 Carriers

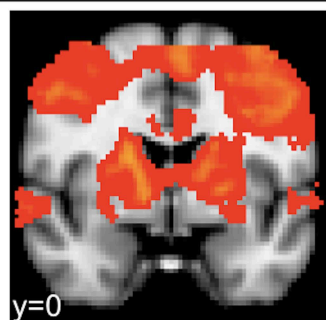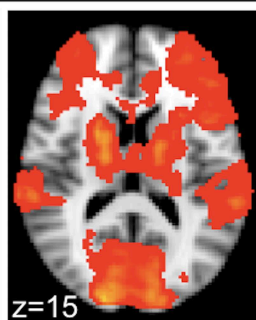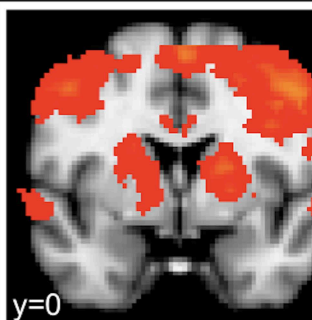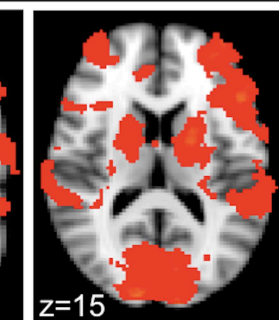

## APOE $\epsilon$ 4 Non-carriers & APOE $\epsilon$ 4 Carriers

Anterior Hippocampus x Encoding

Anterior Hippocampus x Retrieval

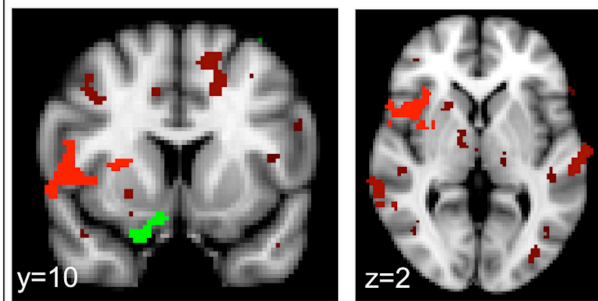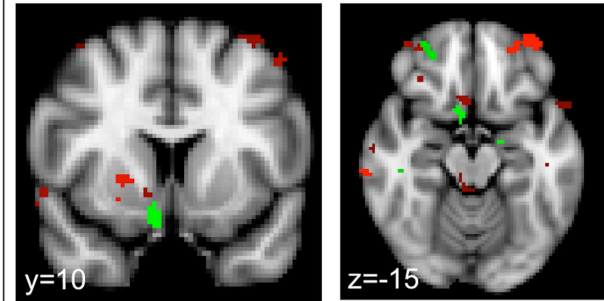

## APOE $\epsilon$ 4 Non-carriers & APOE $\epsilon$ 4 Carriers

Posterior Hippocampus x Encoding

Posterior Hippocampus x Retrieval

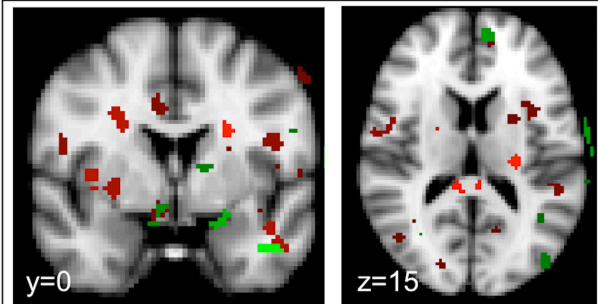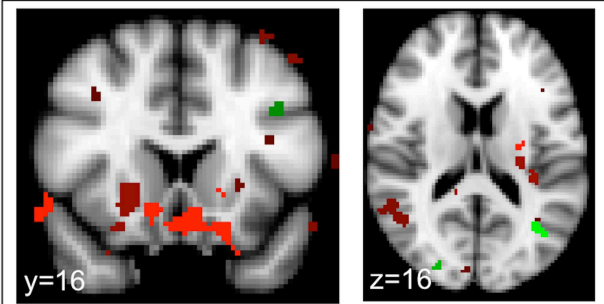

## APOE $\epsilon$ 4 Non-carriers & APOE $\epsilon$ 4 Carriers

Anterior Hippocampus x Encoding

Anterior Hippocampus x Retrieval

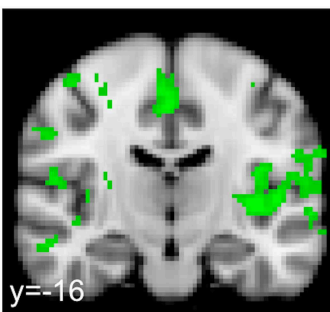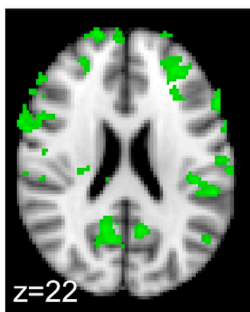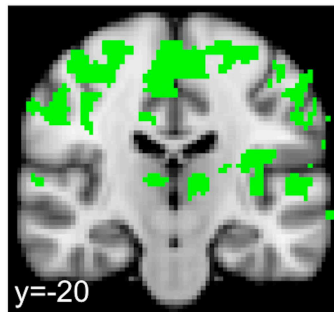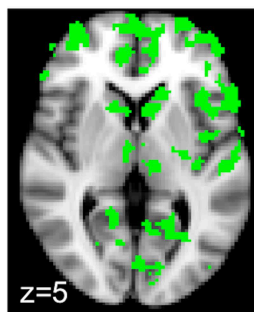

## APOE $\epsilon$ 4 Non-carriers & APOE $\epsilon$ 4 Carriers

Posterior Hippocampus x Encoding

Posterior Hippocampus x Retrieval

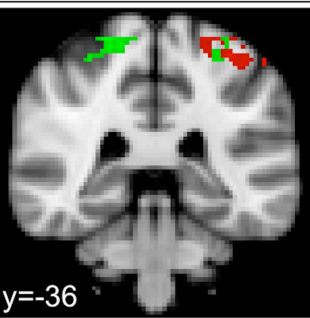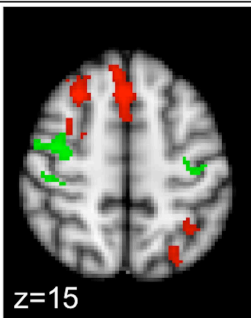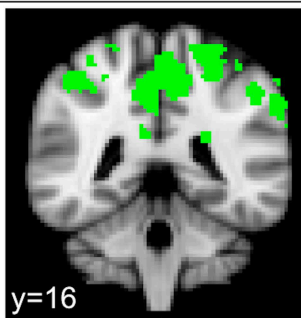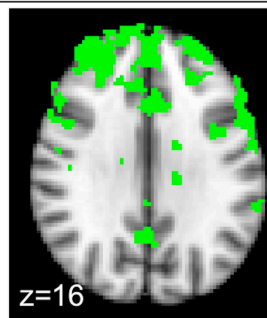

# APOE $\epsilon$ 4 Non-carriers > Carriers : Anterior Hippocampus

Encoding

Retrieval

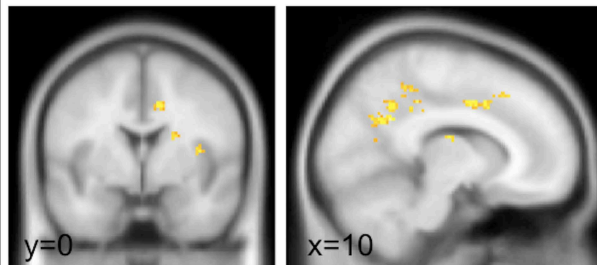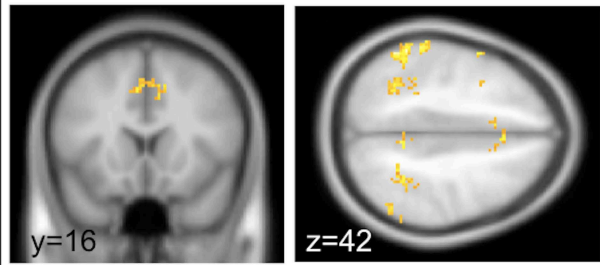

# APOE $\epsilon$ 4 Non-carriers > Carriers : Posterior Hippocampus

Encoding

Retrieval

No significant differences

No significant differences

## Anterior Hippocampus

Encoding

Retrieval

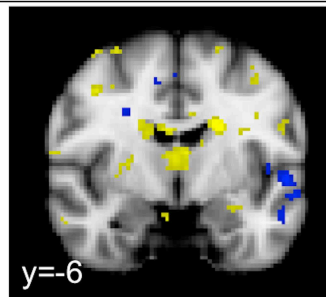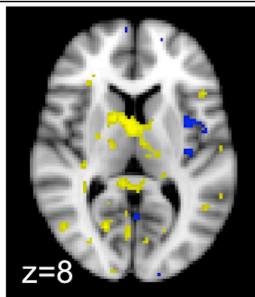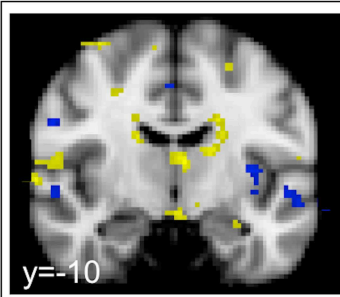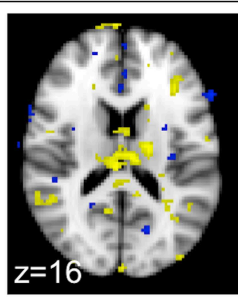

## Posterior Hippocampus

Encoding

Retrieval

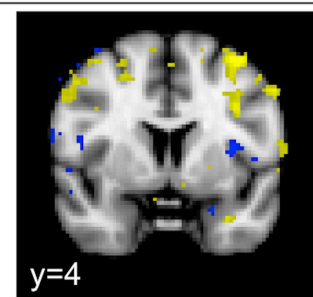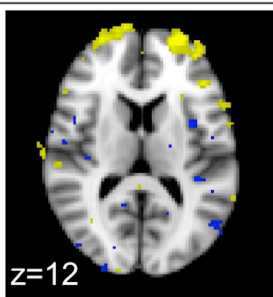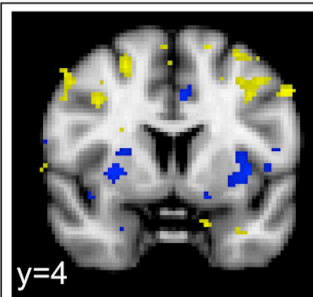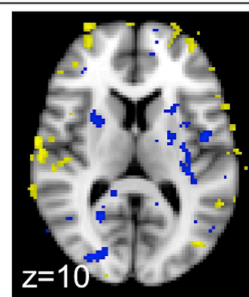

# Anterior Hippocampus x Encoding

L

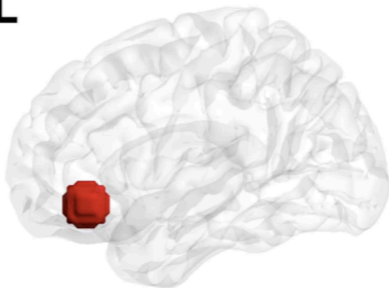

Orbitofrontal 6mm Sphere:  
-30, 36, -10

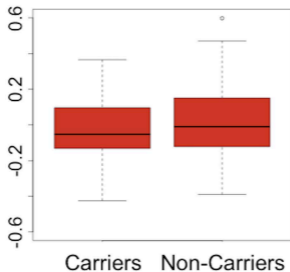

Supplement: NIHMS731882-supplement-Supp_FigureS1-S6.pdf [file NIHMS731882-supplement-Supp_FigureS1-S6.pdf]
